# Supplementary material for: Microbial communities and their predictive functional profiles in the arid soil of Saudi Arabia
Source: Copernicus journal article supplement (doi:10.5194/soil-6-513-2020), 2020-10-22
Supplement: Supplementary file 1 [file soil-6-513-2020-supplement.pdf]

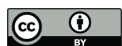

## *Supplement of*

# **Microbial communities and their predictive functional profiles in the arid soil of Saudi Arabia**

**Munawwar A. Khan and Shams T. Khan**

*Correspondence to:* Shams T. Khan (shamsalig75@gmail.com)

The copyright of individual parts of the supplement might differ from the CC BY 4.0 License.

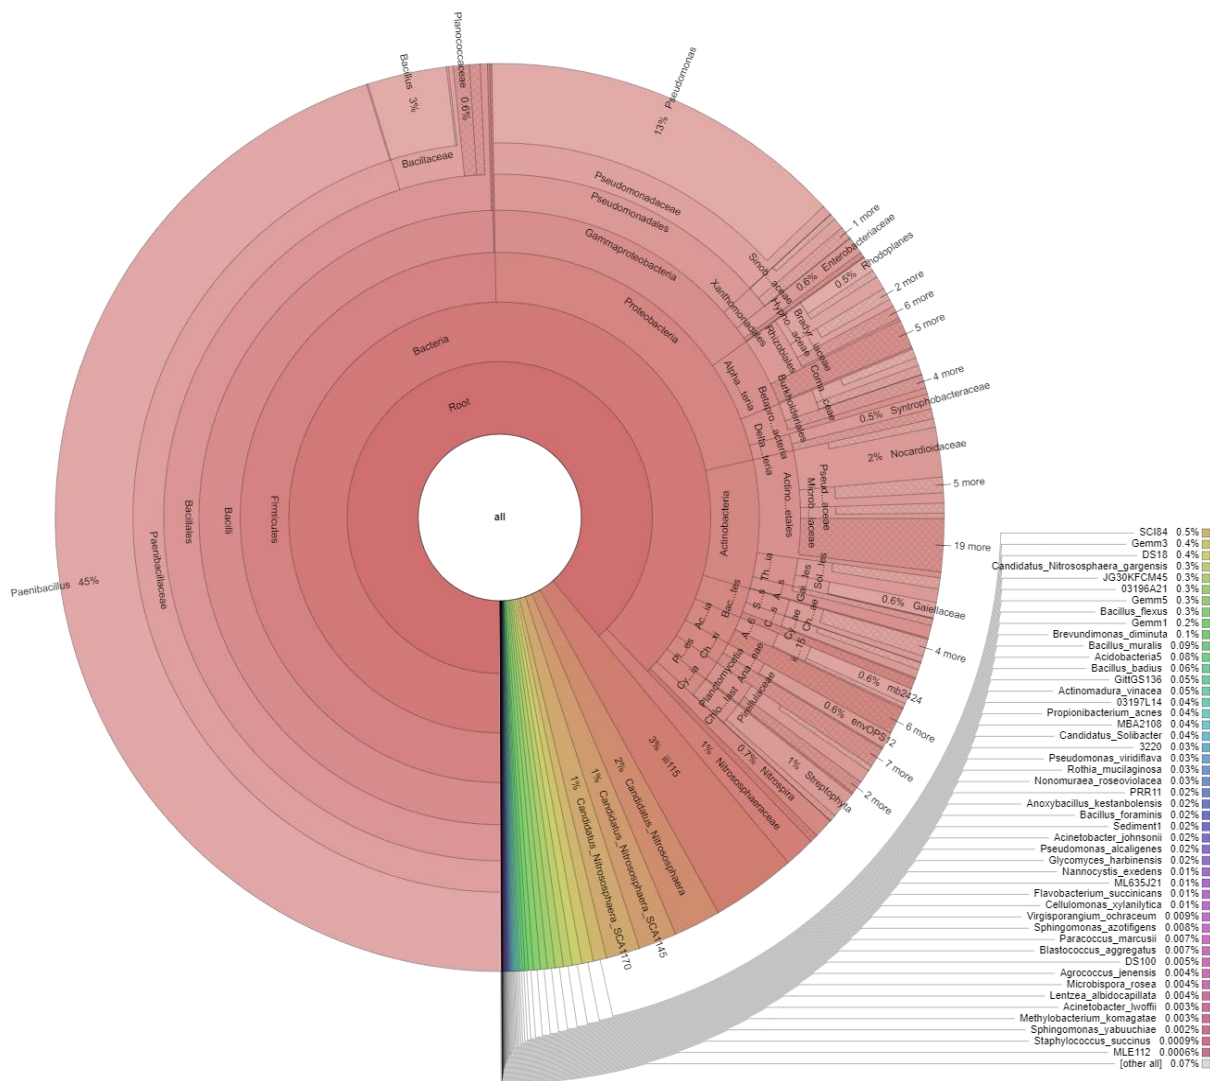

**M15**

**Figure S1**

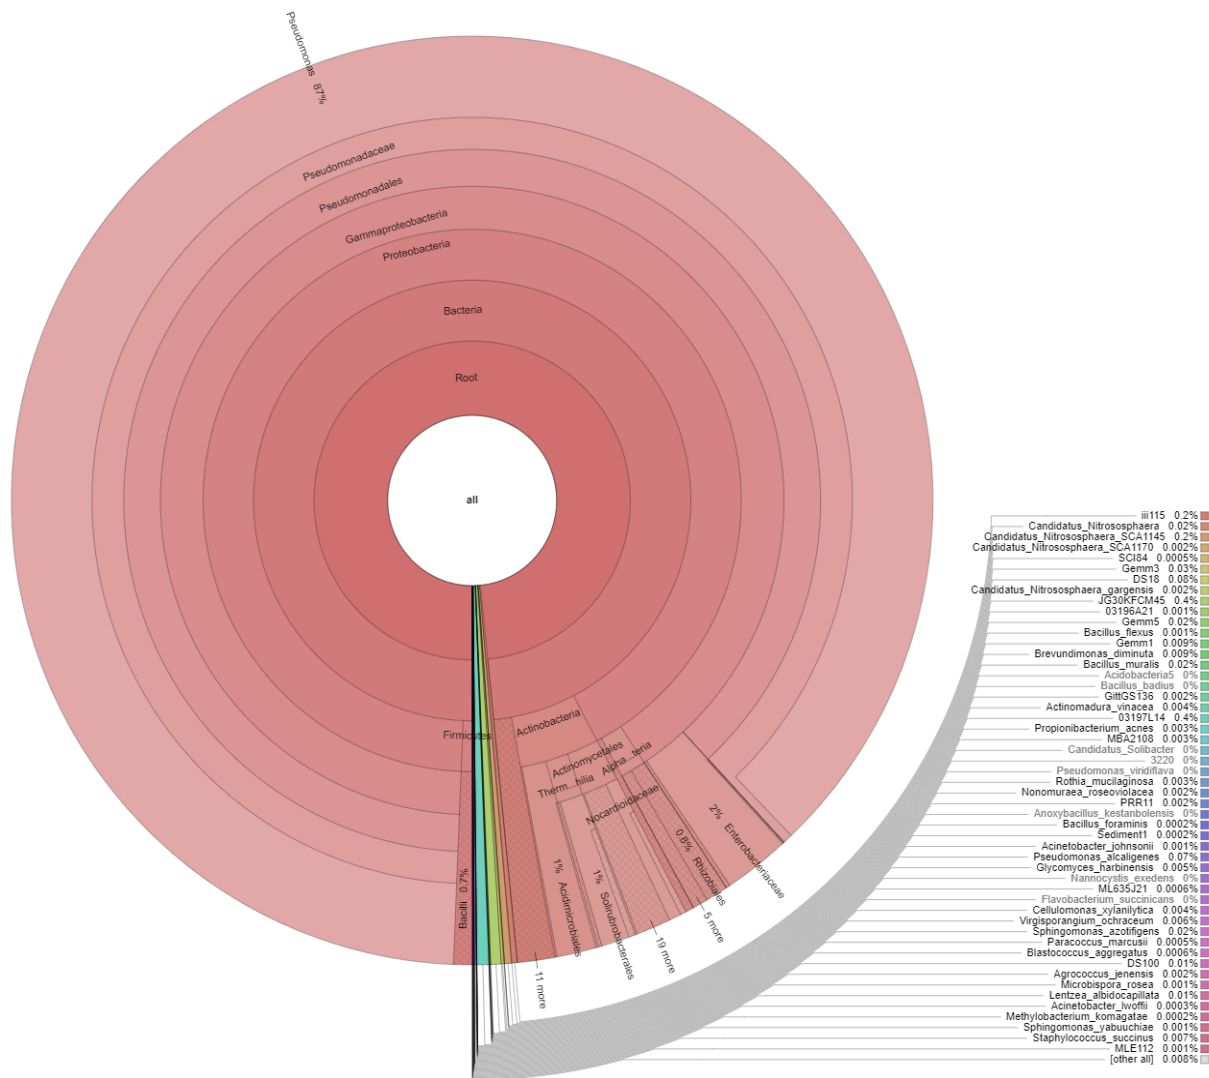

**M5**

**Figure S2**

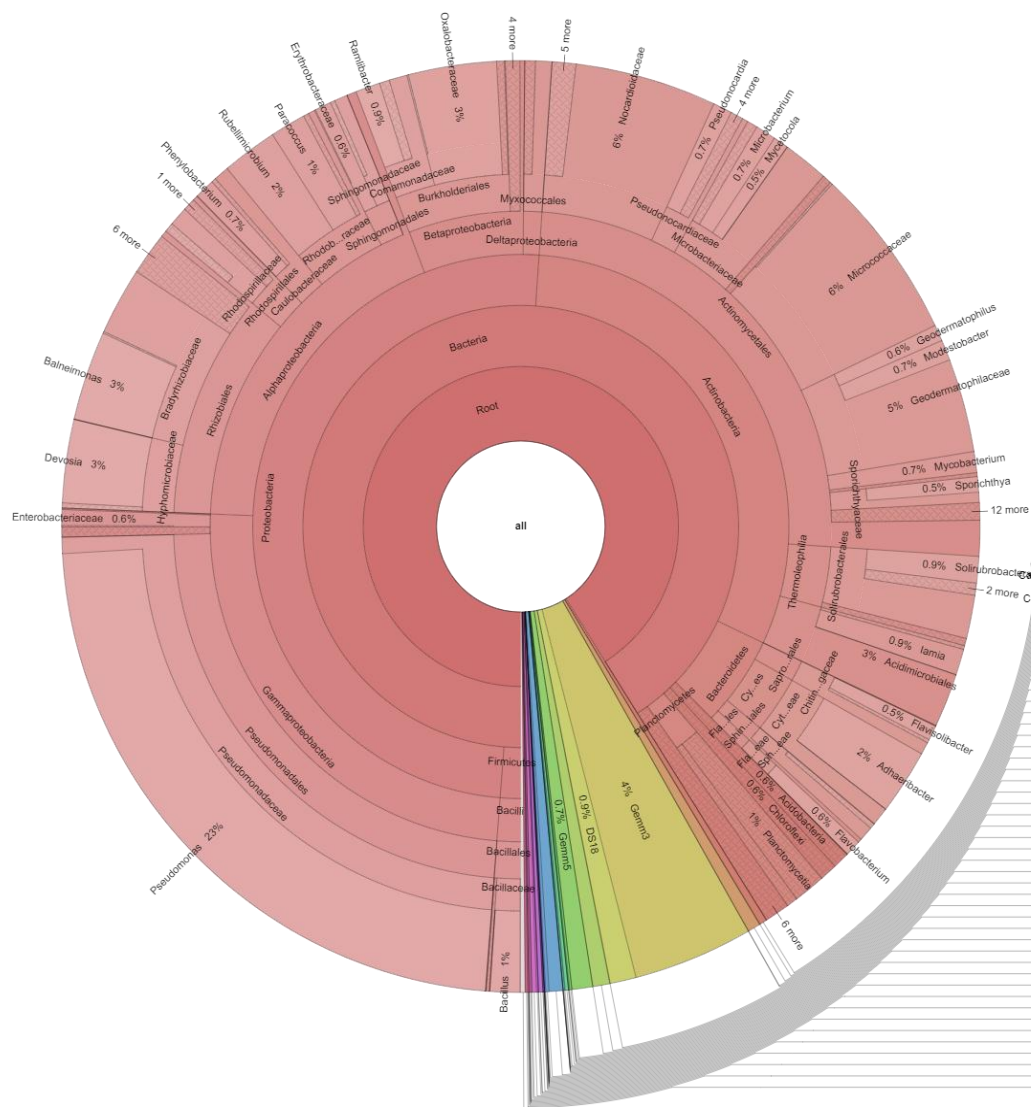

ABHA

Figure S3

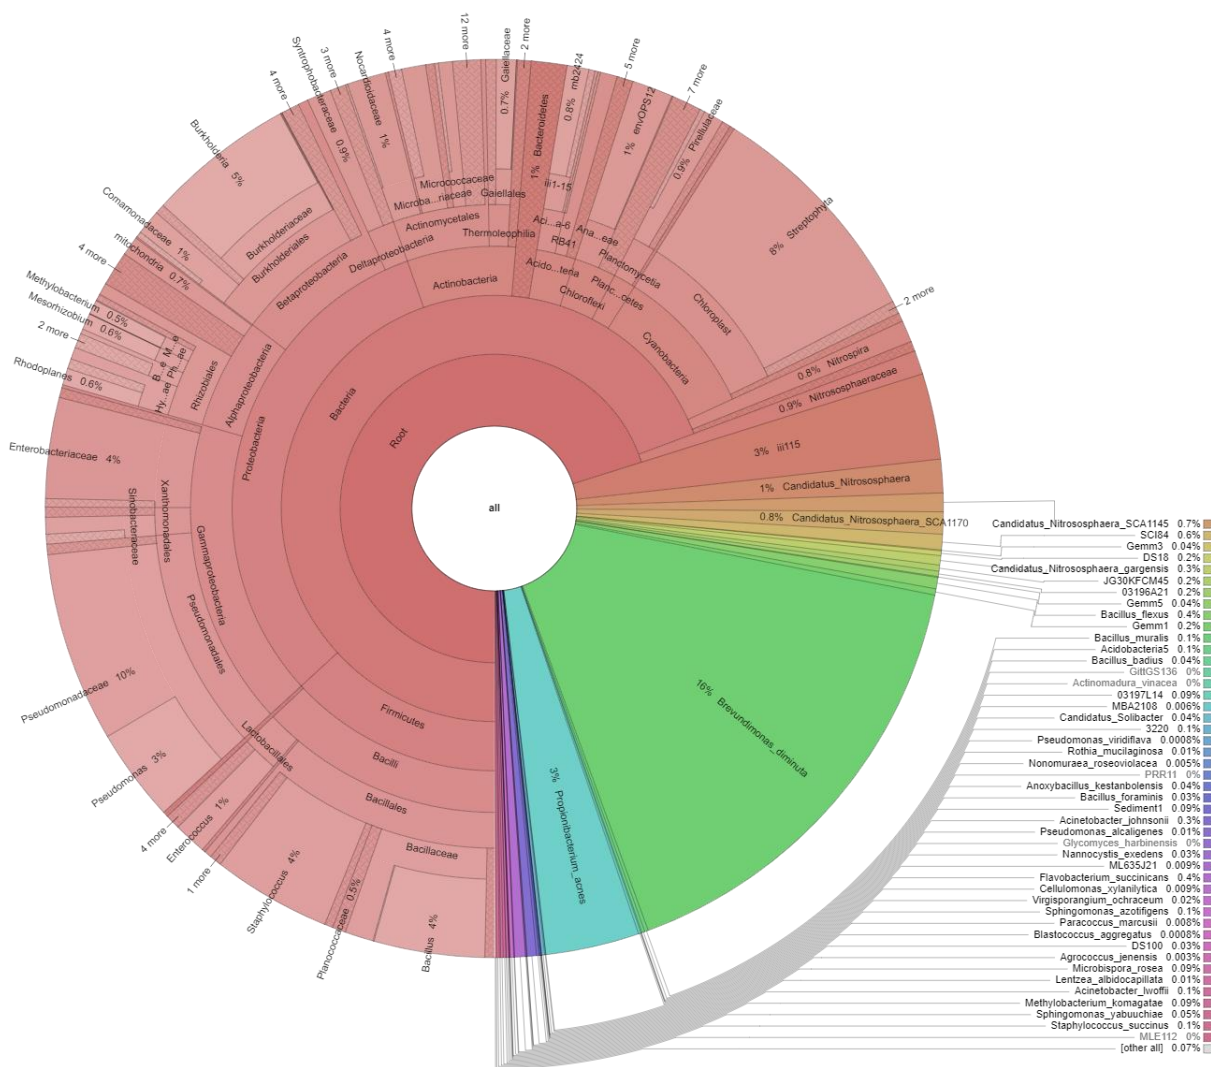

# Hafr Al-Batin

Figure S4
